# Supplementary material for: Rotational symmetry dication assembling ferroelectric, thermochromic and circularly polarized luminescent multifunctional manganese( ii ) bromide hybrid
Source: Royal Society of Chemistry journal article supplement (doi:10.1039/d5sc08499g), 2026-01-01
Supplement: d5sc08499g1.pdf [file d5sc08499g1.pdf]

## Supporting Information

### **Rotational Symmetry Dication Assembling Ferroelectric, Thermochromic and Circularly Polarized Luminescent Multifunctional Manganese(II) Bromide Hybrid**

Jiayi Yuan,<sup>a</sup> Yu Xu,<sup>a</sup> Lu Zhai,<sup>\*a</sup> Shan-Shan Hei,<sup>a</sup> Jianyi Huang,<sup>b</sup> Wei-Hua Ning,<sup>\*b</sup>  
Hong-Ling Cai,<sup>\*c</sup> and Xiao-Ming Ren<sup>\*a</sup>

<sup>a</sup> State Key Laboratory of Materials-Oriented Chemical Engineering and College of Chemistry and Molecular Engineering, Nanjing Tech University, Nanjing 211816, P. R. China

<sup>b</sup> Institute of Functional Nano & Soft Materials (FUNSOM), Joint International Research Laboratory of Carbon-Based Functional Materials and Devices, Soochow University, Suzhou 215123, P. R. China

<sup>c</sup> National Laboratory of Solid-State Microstructures, Collaborative Innovation Center of Advanced Microstructures, School of Physics, Nanjing University, Nanjing 210093, P. R. China

Tel: 86-25-58139476

E-mail:

[zhailu@njtech.edu.cn](mailto:zhailu@njtech.edu.cn)

[whning@suda.edu.cn](mailto:whning@suda.edu.cn)

[hlcai@nju.edu.cn](mailto:hlcai@nju.edu.cn)

[xmren@njtech.edu.cn](mailto:xmren@njtech.edu.cn)

# Table of Contents

## 1. Methods and Instrumentation

## 2. Characterization

**Figure S1.** Photographs of single crystals of **1** taken under ambient light and 365 nm ultraviolet light.

**Figure S2.** The experimental PXRD patterns and simulated ones based on the single crystal structure of **1** at (a) 293 K (LTP) and (b) 438 K (HTP).

**Figure S3.** (a) DSC curves in three heating-cooling cycles. (b) TG curve of **1** in the temperature range from 30 to 800 °C in N<sub>2</sub> flow.

**Figure S4.** The thermal stability of **1** in air.

**Figure S5.** Comparison of Mn-Br bond lengths in the crystal structures of LTP and HTP.

**Figure S6.** Schematic illustration for the hydrogen bonds using dot lines in (a) LTP and (b) HTP.

**Figure S7.** The local hydrogen bonding interactions around the [MnBr<sub>4</sub>]<sup>2-</sup> for (a) Mn1 (b) Mn2 and (c) Mn3 tetrahedron in LTP, respectively. The green dotted lines represent the N–H...Br hydrogen bonds while the pink dotted lines represent the C–H...Br hydrogen bonds between organic cations and inorganic frameworks.

**Figure S8.** The Mn<sup>2+</sup> ions within a lattice reorganized from (a) a non-collinear arrangement (LTP) to (b) a collinear arrangement (HTP).

**Figure S9.** The hydrogen bonding interactions around the [MnBr<sub>4</sub>]<sup>2-</sup> for (a) Mn1 (b) Mn2 and (c) Mn3 tetrahedron in HTP, respectively. The pink dotted lines represent the C–H...Br hydrogen bonds between organic cations and inorganic frameworks.

**Figure S10.** Hirshfeld surface and 2D fingerprint of the cations of in the asymmetric unit of LTP.

**Figure S11.** Hirshfeld surface and 2D fingerprint of the cations of in the asymmetric unit of HTP.

**Figure S12.** Variable-temperature PXRD patterns of (a) **1** within the 2θ range of 5–50° and (b) within a special range where the obvious changes occur.

**Figure S13.** Excitation-dependent PL spectra of **1** at 298 K.

**Figure S14.** (a) The PLQY measurement of **1** at room temperature upon 365 nm UV excitation (b) the decay lifetime monitored at 555 nm.

**Figure S15.** The fitted curve of PL intensity to temperature using the Arrhenius equation.

**Figure S16.** (a) CPL and (b)  $g_{lum}$  spectra of **1** with different angle measurements.

**Figure S17.** (a) The electroluminescence spectra of the LED at different voltages. (b) CIE diagram of the LED constituted of **1**.

### 3. Supporting Tables

**Table S1.** The crystallographic and structure refinement data for LTP and HTP and racemic crystal

**Table S2.** Selected bond distances (Å) and bond angles (°) for LTP and HTP

**Table S3.** Details of hydrogen and halogen bonds of LTP

**Table S4.** Details of hydrogen and halogen bonds of HTP

**Table S5.** Bond length distortion and bond angle variance of  $MnBr_4$  units of LTP and HTP

**Table S6.** Comparison of  $g_{lum}$ , curie temperature ( $T_c$ ), PLQY, SHG intensity and saturation polarization ( $P_s$ ) values inside this work with other multifunctional materials in literatures (black) and this work (red)

### 4. References

## 1. Methods and Instrumentation

### Reagents and materials

All chemicals and reagents, including 1,4-diazabicyclo[2.2.2]octane (DABCO), manganese (II) bromide tetrahydrate ( $\text{MnBr} \cdot 4\text{H}_2\text{O}$ , 98%), hydrobromic acid (HBr, 48 wt% in water, Aladdin) and anhydrous methanol (99.7%), methyl bromide, acetone, isopropanol and methanol were purchased from commercial suppliers and used as received.

### Synthesis Methods:

#### Synthesis of [H-Pr-DABCO]Br

The preparation of 1-Propyl-1,4-diazabicyclo[2.2.2]octan-1-ium bromide ([H-Pr-DABCO]Br) is according to the reported method.<sup>[1]</sup> The obtained product is a colorless, oily liquid.

#### Synthesis of the single crystal of [H-Pr-DABCO]MnBr<sub>4</sub> (1)

Mixture of  $\text{MnBr}_2 \cdot 4\text{H}_2\text{O}$  (0.143 g, 0.5 mmol) and [H-Pr-dabco]Br (0.143 g, 0.5 mmol) were dissolved in the solution containing HBr (1 mL) and isopropanol (2 mL). The precursor solution was sealed in a 10 mL Teflonlined autoclave and reacted at 85 °C for 24 h, and cooled to room temperature. Subsequently, the solution was volatilized at 50 °C for three days and yellow emissive crystals were obtained, which were determined to be [H-Pr-dabco]MnBr<sub>4</sub> ( $\text{C}_9\text{N}_2\text{H}_{20}\text{MnBr}_4$ ) by single crystal X-ray diffraction. Anal. Calcd. for  $\text{C}_9\text{N}_2\text{H}_{20}\text{MnBr}_4$ : C, 20.36%; H, 3.79%; N, 5.28%; found: C, 20.51%; H, 3.59%; N, 5.25%.

#### Single crystal X-ray diffraction measurements

Single crystal structure was collected on a Bruker D8 advance diffractometer equipped with a CCD detector by Mo-K $\alpha$  irradiation (wavelength equal to 0.71073 Å) at 293 K and 438 K. The structures were analyzed by direct methods and refined with full-matrix least-square methods based on  $F^2$  (SHELXL-2014 software package). All non-hydrogen atoms of the structure were refined anisotropically, hydrogen atoms were positioned geometrically and allowed to ride on their parent atoms with constrained thermal parameters. Crystal data and structure refinement parameters are summarized in Table S1. Deposition Numbers 2467490 (for LTP) and 2467491 (for HTP) contains

the supplementary crystallographic data for this paper. These data are provided free of charge by the joint Cambridge Crystallographic Data Centre and Fachinformationszentrum Karlsruhe (<http://www.ccdc.cam.ac.uk/structures>) Access Structures service.

### **Powder X-ray diffraction (PXRD)**

PXRD of polycrystalline powder was carried out by a MiniFlex600 X-ray diffractometer with Cu K $\alpha$  ( $\lambda = 1.5404 \text{ \AA}$ ) radiation in the 2-theta ranges of 5-50° with a step length of 0.02° to check the phase purity of the as-grown crystals.

### **Variable-temperature powder X-ray diffraction (PXRD)**

Powder X-ray diffraction data were obtained on a Rigaku D/MAX 2000 PC X-ray diffractometer in the temperature range from 298 to 473 K. Diffraction patterns were collected in the 2 $\theta$  range of 5–50° with a step size of 0.02°.

### **Thermogravimetric, Differential scanning calorimetry and Dielectric measurements**

The thermogravimetric (TG) analysis measurement was performed on a HITACHI STA200 simultaneous thermal analyzer at a heating rate of 10°C min<sup>-1</sup> from room temperature to 800 °C in N<sub>2</sub> flow using an alumina crucible. Differential scanning calorimetry (DSC) measurements were carried out within the specified temperature range at a rate of 20 K min<sup>-1</sup> using a PerkinElmer Diamond DSC instrument. Dielectric were measured under N<sub>2</sub> atmosphere using a Concept 80 system (Novocontrol, Germany) from 150 K to 400 K with the frequency of 10<sup>3</sup>–10<sup>7</sup> Hz. The powder sample was pressed into a pellet with a diameter of 7 mm. And then the silver paste was evenly smeared on both sides to make a capacitor.

### **Second-harmonic generation (SHG) .**

The SHG response was measured, using the Kurtz–Perry method with a home-built scanning microscope using an Nd:YAG laser (wavelength of 1064 nm, input pulse power of 400 mV) in reflection geometry. The numerical values of the nonlinear optical coefficients for SHG have been determined by comparison with a KH<sub>2</sub>PO<sub>4</sub> (KDP) reference. The test samples were polycrystalline powder.

### **Polarization-Electric Field (P-E) Hysteresis Loops**

*P-E* hysteresis loops measurements were performed on a powder-pressed pellet sample by using the so-called double-wave method. The Positive Up Negative Down (PUND) ferroelectric tests were got on a Precision LC ferroelectric analyzer (Radiant Technology Product, USA). The ferroelectric hysteresis loop was got by TF Analyzer 2000E. The single crystal selected to measure the dielectric hysteresis loop on a ferroelectric tester (Radiant Technology), with electrodes made of Cu wire with an  $\sim 150\ \mu\text{m}$  diameter covered by Ag-conducting glue on the approximate crystallographic face (001), respectively.

### **Optical Measurements**

The UV-vis diffuse reflectance spectra were measured using a UV-vis absorption spectrophotometer (PerkinElmer, Lambda 1050) in the wavelength range of 200–800 nm. The PL spectra, PLE spectra, time-resolved PL, and photoluminescence quantum yield (PLQY) of the sample were measured on an Edinburgh Instruments FLS1000 fluorescence spectrometer at room temperature. The temperature-dependent PL spectra were carried out using a fluorescence spectrometer (PL-TCSPC) in the excitation wavelength of 365 nm at 80 to 300 K. The time-resolved photoluminescence (TRPL) measurement was performed using a fluorescence spectrometer (PL-TCSPC). The PLQY was measured using an absolute PL measurement system (C13534-11, Hamamatsu) and the excitation wavelength was 365 nm.

### **Circular Dichroism Spectra (CD)**

The CD spectra were collected using a CD spectrometer (J-1500, JASCO) at room temperature. The samples for CD measurement were prepared by uniformly grinding the crystals with KBr into fine powder and then pressing into pellets, which were employed as the matrix for performing solid-state CD measurements.

### **Circularly polarized photoluminescence spectroscopy (CPL)**

CPL measurements of single crystals of **1** were performed on a JASCO CPL-300 spectrometer at  $\lambda_{\text{ex}} = 365\ \text{nm}$ . A single crystal was placed in the optical path so that the optical path was perpendicular to the smooth crystal plane. The excitation wavelength employed was 365 nm. All measurements were performed at room temperature.

### **Hirshfeld surface analysis**

Various types of intermolecular interactions are quantified through Hirshfeld surface analysis using the CrystalExplorer21.5 software. On Hirshfeld surfaces mapped with  $d_{\text{norm}}$ , points shorter than the van der Waals distance are labeled red, and points equal to or longer than the van der Waals distance are labeled white and blue, which intuitively provides a perspective for assessing intermolecular interactions.

**Calculations of Tanabe-Sugano (T-S) Matrices.** The crystal field  $Dq$ , Racah parameter  $B$  and correction parameter  $\alpha$  were obtained using the modified energy terms derived by Tanabe and Sugano as follows:

$${}^6S \rightarrow {}^4A_1; {}^4E({}^4G) = 10B + 5C + 20\alpha$$

$${}^6S \rightarrow {}^4E({}^4D) = 17B + 5C + 6\alpha$$

$${}^6S \rightarrow {}^4T_2({}^4D) = 13B + 5C + 8\alpha$$

$${}^6S \rightarrow {}^4T_2({}^4G) = -10Dq + 18B + 6C - (26B^2/10Dq) + 22\alpha$$

Calculated results:  $10Dq = 6173$ ,  $B = 21$ ,  $C = 5811$  and  $\alpha = -324$

## Characterization

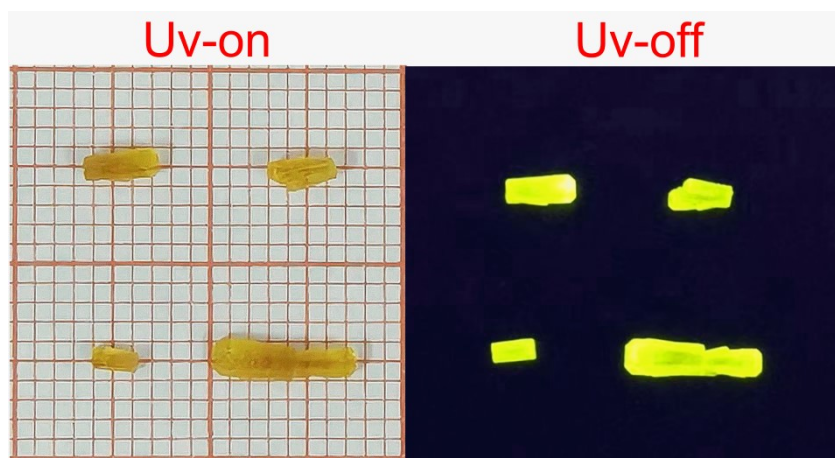

**Figure S1.** Photographs of single crystals of **1** taken under ambient light and 365 nm ultraviolet light.

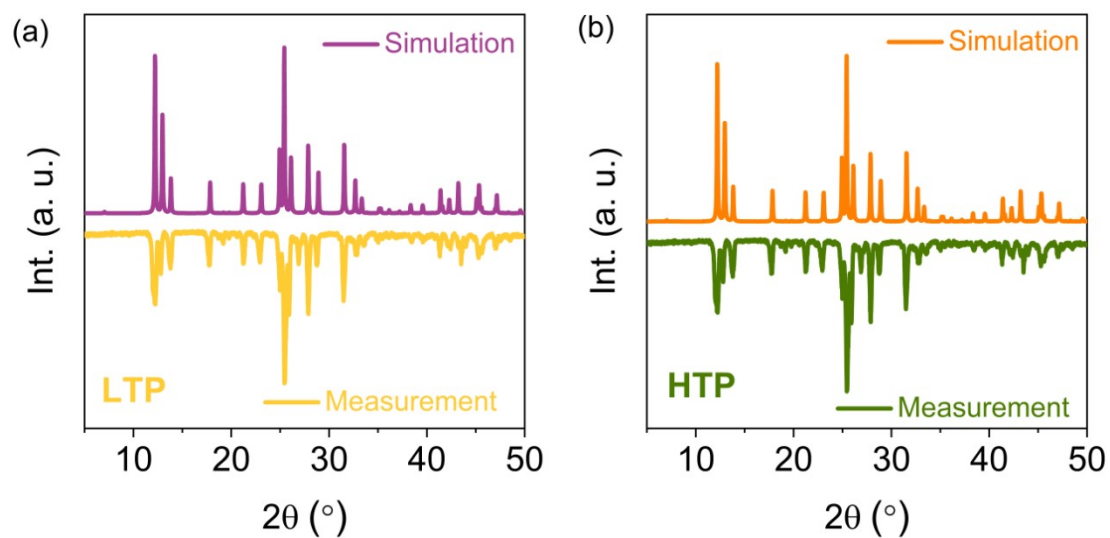

**Figure S2.** The experimental PXRD patterns and simulated ones based on the single crystal structure of **1** at (a) 293 K (LTP) and (b) 438 K (HTP).



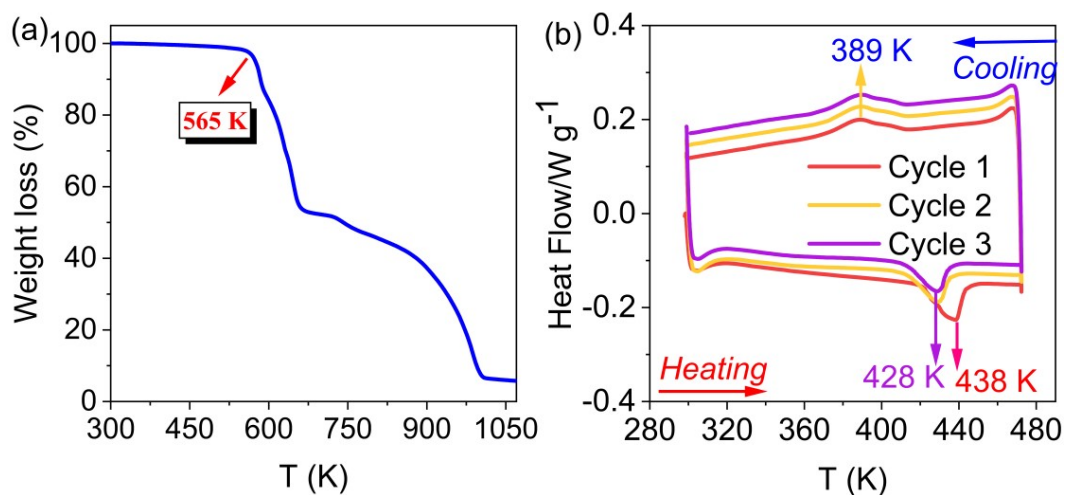

**Figure S3.** (a) TG curve of **1** in the temperature range from 30 to 800 °C in N<sub>2</sub> flow. (b) DSC curves in three heating-cooling cycles.

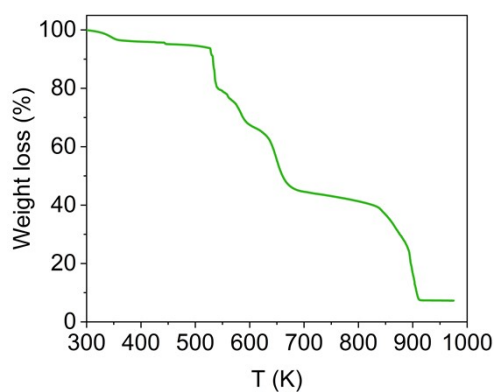

**Figure S4.** The thermal stability of **1** in air.

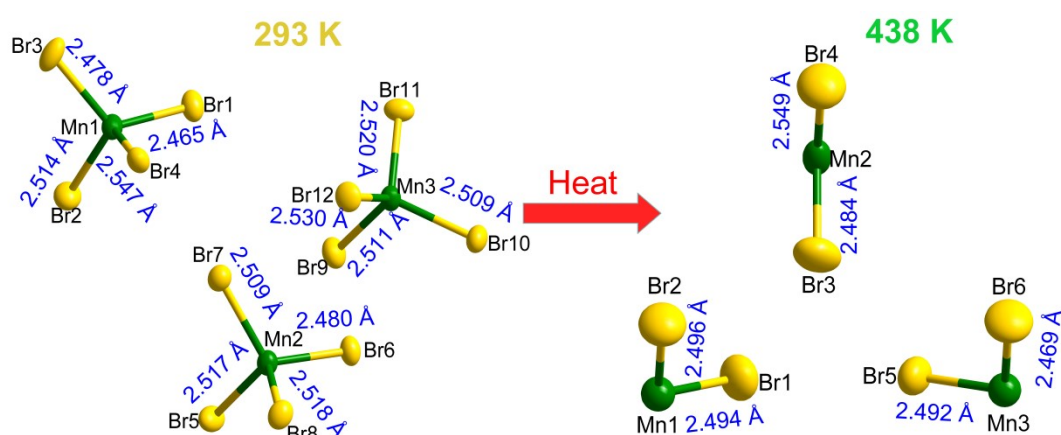

**Figure S5.** Comparison of Mn-Br bond lengths in the crystal structures of LTP and HTP.

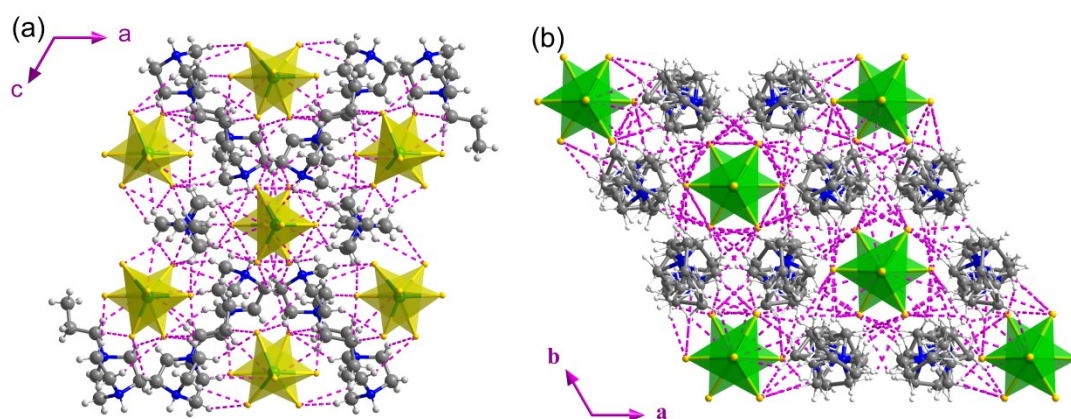

**Figure S6.** Schematic illustration for the hydrogen bonds using dot lines in (a) LTP and (b) HTP.

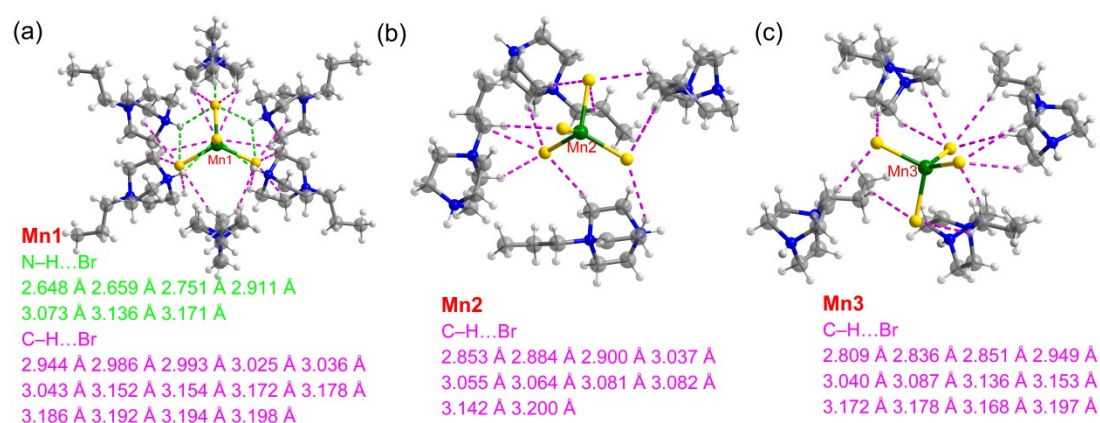

**Figure S7.** The local hydrogen bonding interactions around the  $[\text{MnBr}_4]^{2-}$  for (a) Mn1 (b) Mn2 and (c) Mn3 tetrahedron in LTP, respectively. The green dotted lines represent the N-H...Br hydrogen bonds while the pink dotted lines represent the C-H...Br hydrogen bonds between organic cations and inorganic frameworks.

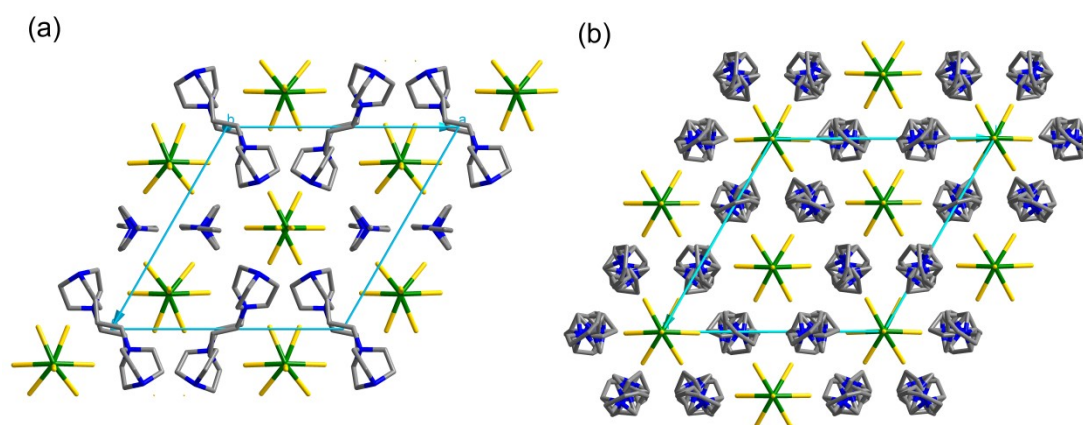

**Figure S8.** The Mn<sup>2+</sup> ions within a lattice reorganized from (a) a non-collinear arrangement (LTP) to (b) a collinear arrangement (HTP).

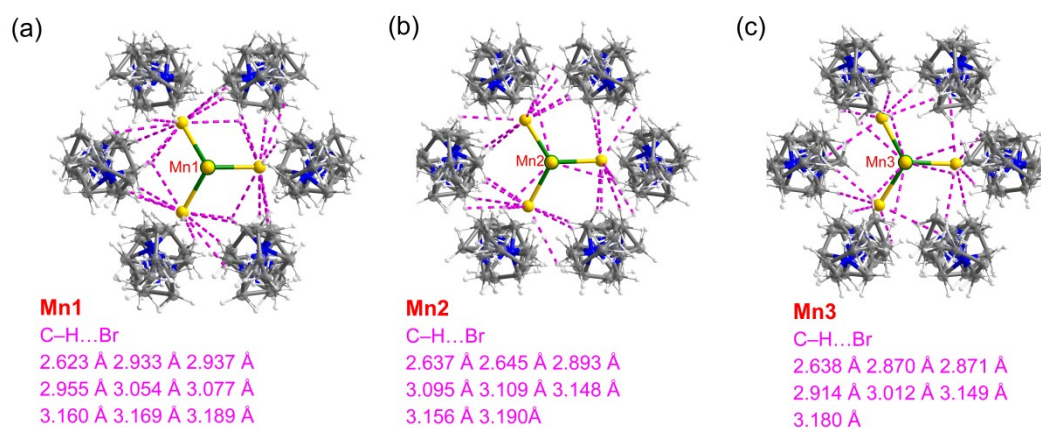

**Figure S9.** The hydrogen bonding interactions around the [MnBr<sub>4</sub>]<sup>2-</sup> for (a) Mn1 (b) Mn2 and (c) Mn3 tetrahedron in HTP, respectively. The pink dotted lines represent the C-H...Br hydrogen bonds between organic cations and inorganic frameworks.

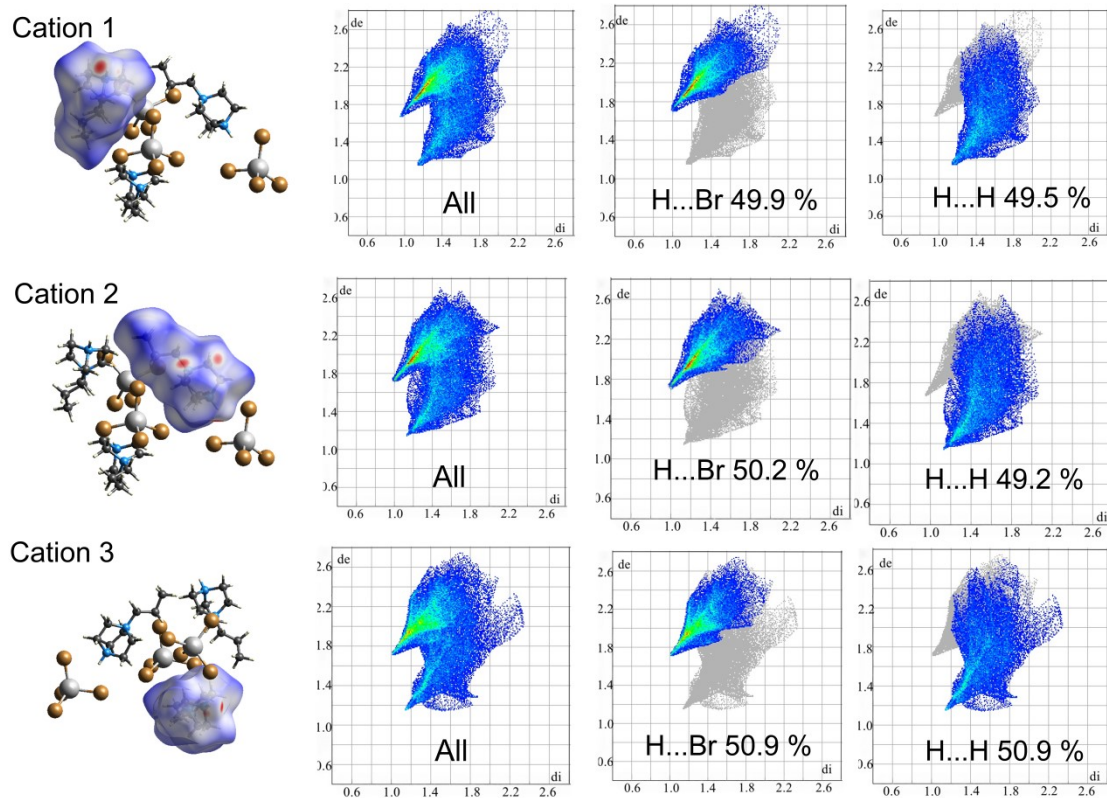

**Figure S10.** Hirshfeld surface and 2D fingerprint of the cations of in the asymmetric unit of LTP.

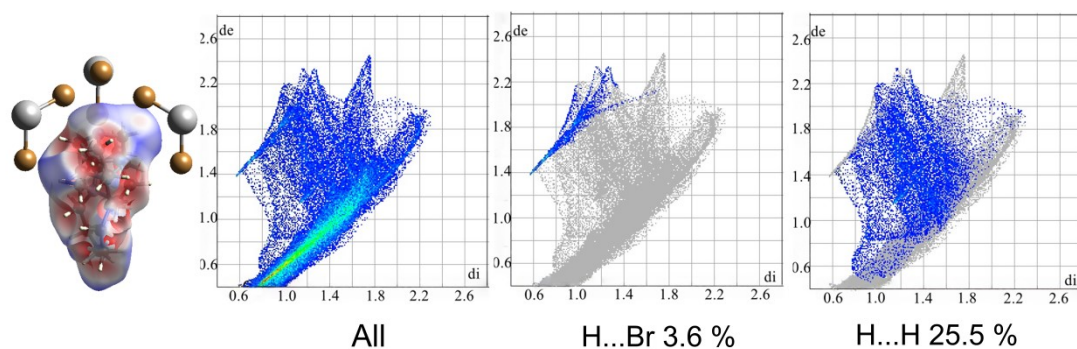

**Figure S11.** Hirshfeld surface and 2D fingerprint of the cations of in the asymmetric unit of HTP.



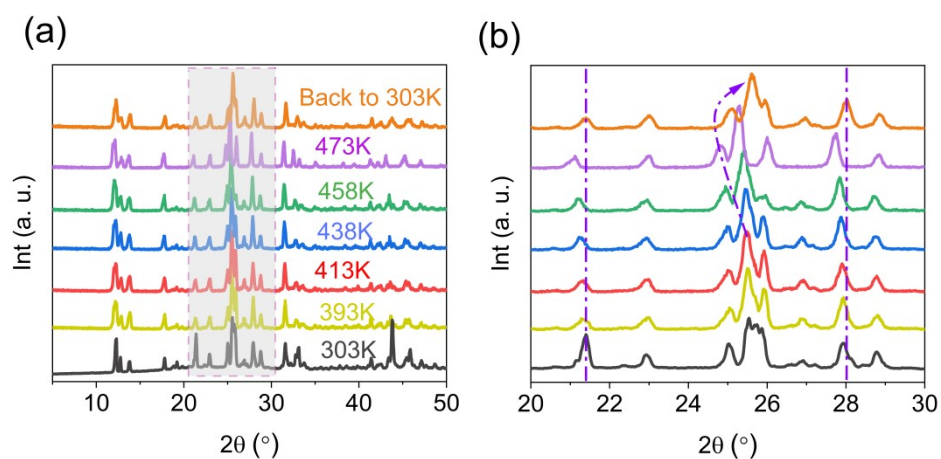

**Figure S12.** Variable-temperature PXRD patterns of (a) **1** within the  $2\theta$  range of  $5\text{--}50^\circ$  and (b) within a special range where the obvious changes occur.

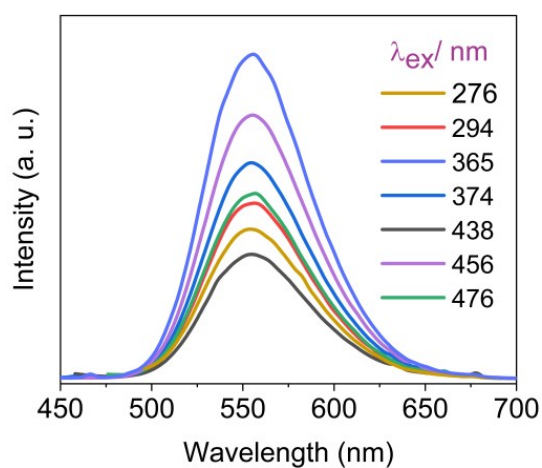

**Figure S13.** Excitation-dependent PL spectra of **1** at 298 K.

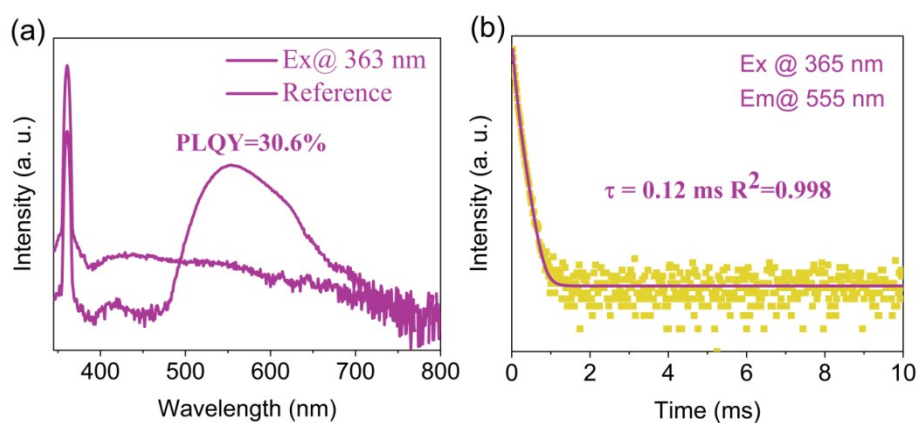

**Figure S14.** (a) The PLQY measurement of **1** at room temperature upon 365 nm UV excitation (b) the decay lifetime monitored at 555 nm.

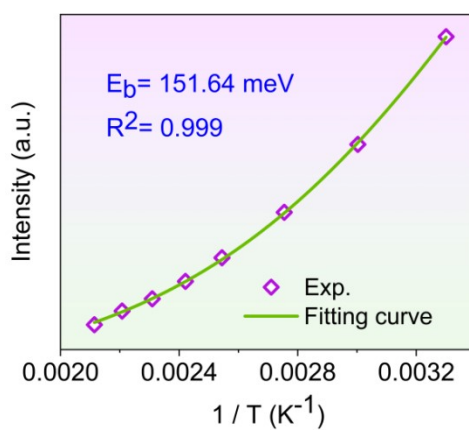

**Figure S15.** The fitted curve of PL intensity to temperature using the Arrhenius equation.

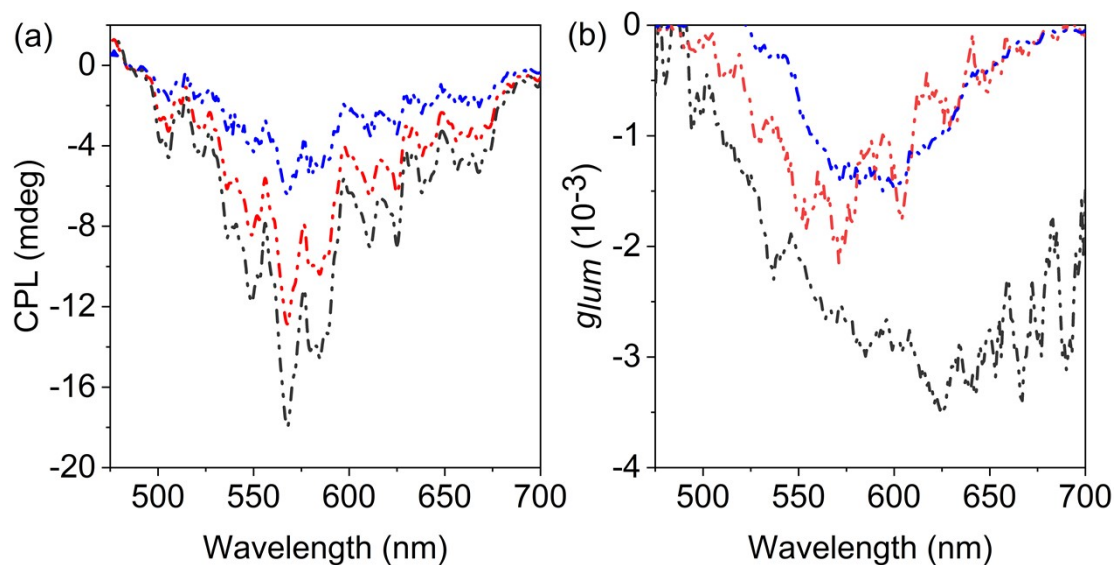

**Figure S16.** (a) CPL and (b)  $g_{lum}$  spectra of **1** with different angle measurements.

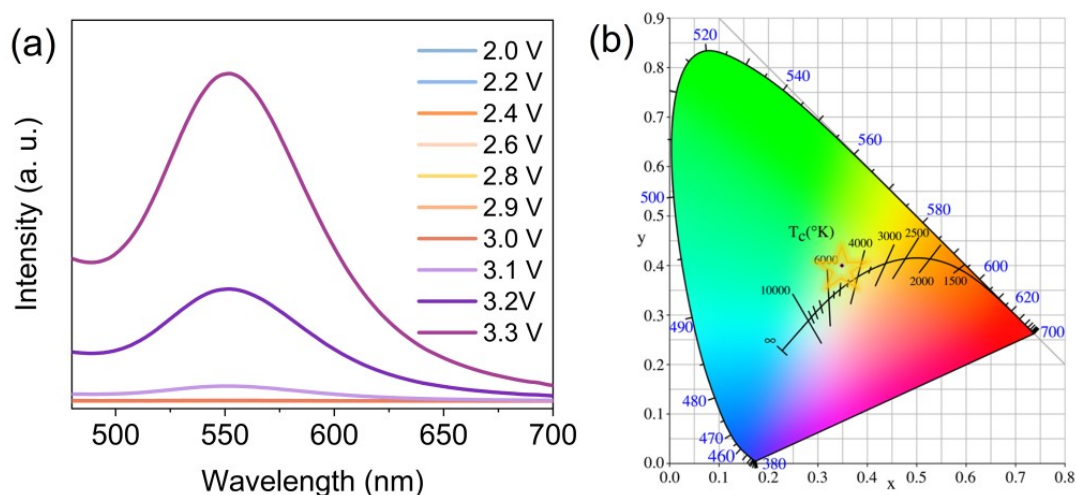

**Figure S17.** (a) The electroluminescence spectra of the LED at different voltages. (b) CIE diagram of the LED constituted of **1**.

### Point Charge Calculation on Saturated Polarization

According to the crystallographic data of **1** at LTP and HTP phase, we select a unit cell and assume that the centers of the positive charges of the cations are located on the N, Mn atoms, and the negative charges of the anions are located on the Br atoms, respectively.

| Atoms (Count)        | Center coordination            |
|----------------------|--------------------------------|
| <b>293 K</b>         |                                |
| Mn <sup>2+</sup> (6) | (0.51013, 0.57607, 0.35427)    |
| N <sup>+</sup> (12)  | (0.57263, 0.46473, 0.50010)    |
| Br <sup>-</sup> (24) | (-0.48930, -0.60033, -0.41677) |

**Along *c*-axis:**

$$\begin{aligned}
P_s &= \lim \frac{1}{V} \sum q_i r_i \\
&= (q_N r_N + q_{Mn} r_{Mn} + q_{Br} r_{Br}) / V \\
&= [(12 \times e \times 0.35427) + (2 \times 6 \times e \times 0.50010) + (-24 \times e \times 0.41677)] \times c / V \\
&= [0.24996 \times 1.6 \times 10^{-19} \times 14.316 \times 10^{-10} \text{ C m}] / (2424.0 \times 10^{-30} \text{ m}^3) \\
&= 0.02362 \text{ C m}^{-2} \\
|P_s| &= 0.02362 \text{ C m}^{-2} = 23.62 \mu\text{C cm}^{-2}
\end{aligned}$$



### 3. Supporting Tables

**Table S1.** The crystallographic and structure refinement data for LTP and HTP

| Identification code                         | LTP                                                               | HTP                                                               |
|---------------------------------------------|-------------------------------------------------------------------|-------------------------------------------------------------------|
| Chemical formula                            | C <sub>9</sub> H <sub>19</sub> N <sub>2</sub> MnBr <sub>4</sub>   | C <sub>9</sub> H <sub>19</sub> N <sub>2</sub> MnBr <sub>4</sub>   |
| CCDC number                                 | 2467490                                                           | 2467491                                                           |
| Formula weight                              | 529.84                                                            | 529.84                                                            |
| Temperature / K                             | 293.00                                                            | 438.15                                                            |
| Crystal system                              | Monoclinic                                                        | Rigonal                                                           |
| Space group                                 | <i>P</i> 2 <sub>1</sub>                                           | <i>P</i> 3c <sub>1</sub>                                          |
| <i>a</i> / Å                                | 14.2814(11)                                                       | 14.4907(16)                                                       |
| <i>b</i> / Å                                | 13.6741(9)                                                        | 14.4907(16)                                                       |
| <i>c</i> / Å                                | 14.3160(16)                                                       | 13.6423(18)                                                       |
| $\alpha$ / °                                | 90                                                                | 90                                                                |
| $\beta$ / °                                 | 90                                                                | 90                                                                |
| $\gamma$ / °                                | 120                                                               | 120                                                               |
| <i>V</i> (Å <sup>3</sup> ) / <i>Z</i>       | 2424.0(4)/6                                                       | 2480.8(6)/6                                                       |
| <i>F</i> (000)                              | 1512                                                              | 1512                                                              |
| $\theta$ range for data collection / °      | 2.84 to 23.39                                                     | 2.811 to 26.369                                                   |
| Index range                                 | -16 ≤ <i>h</i> ≤ 17<br>-15 ≤ <i>k</i> ≤ 16<br>-17 ≤ <i>l</i> ≤ 17 | -16 ≤ <i>h</i> ≤ 18<br>-18 ≤ <i>h</i> ≤ 16<br>-18 ≤ <i>h</i> ≤ 17 |
| Refl. collected/unique                      | 17852 / 22445                                                     | 18760                                                             |
| Goodness-of-fit on <i>F</i> <sup>2</sup>    | 1.037                                                             | 1.053                                                             |
| Final <i>R</i> indices [I > 2σ( <i>I</i> )] | <i>R</i> <sub>1</sub> = 0.0929, <i>wR</i> <sub>2</sub> = 0.2259   | <i>R</i> <sub>1</sub> = 0.0942, <i>wR</i> <sub>2</sub> = 0.2533   |
| <i>R</i> indices(all data)                  | <i>R</i> <sub>1</sub> = 0.1150, <i>wR</i> <sub>2</sub> = 0.2408   | <i>R</i> <sub>1</sub> = 0.1833, <i>wR</i> <sub>2</sub> = 0.3099   |
| Flack parameter                             | 0.006(15)                                                         | 0.19(11)                                                          |

**Table S2.** Selected bond distances (Å) and bond angles (°) for LTP and HTP

| Bond length (Å) |          | Bond angle (°) |               |          |
|-----------------|----------|----------------|---------------|----------|
| LPT             | Mn1-Br1  | 2.465(9)       | Br3-Mn1-Br4   | 104.1(3) |
|                 | Mn1-Br2  | 2.514(8)       | Br3-Mn1-Br2   | 108.8(3) |
|                 | Mn1-Br3  | 2.478(8)       | Br1-Mn1-Br4   | 104.5(3) |
|                 | Mn1-Br4  | 2.547(9)       | Br1-Mn1-Br3   | 118.8(4) |
|                 | Mn2-Br5  | 2.517(8)       | Br1-Mn1-Br2   | 108.1(3) |
|                 | Mn2-Br6  | 2.480(8)       | Br2-Mn1-Br4   | 112.5(3) |
|                 | Mn2-Br7  | 2.509(8)       | Br7-Mn2-Br8   | 115.6(3) |
|                 | Mn2-Br8  | 2.518(8)       | Br7-Mn2-Br5   | 104.4(3) |
|                 | Mn3-Br9  | 2.511(9)       | Br6-Mn2-Br8   | 108.7(3) |
|                 | Mn3-Br10 | 2.509(8)       | Br6-Mn2-Br7   | 112.7(3) |
|                 | Mn3-Br11 | 2.520(8)       | Br6-Mn2-Br5   | 109.1(3) |
|                 | Mn3-Br12 | 2.530(8)       | Br5-Mn2-Br8   | 105.9(3) |
|                 |          |                | Br11-Mn3-Br12 | 115.5(3) |
|                 |          |                | Br10-Mn3-Br11 | 108.5(3) |
|                 |          |                | Br10-Mn3-Br12 | 110.3(3) |
|                 |          |                | Br10-Mn3-Br9  | 110.8(3) |
|                 |          |                | Br9-Mn3-Br11  | 106.4(3) |
|                 |          |                | Br9-Mn3-Br12  | 105.3(3) |
| HTP             | Mn1-Br1  | 2.494(4)       | Br1-Mn1-Br1   | 109.6(2) |
|                 | Mn1-Br2  | 2.496(10)      | Br1-Mn1-Br2   | 109.3(2) |
|                 | Mn2-Br3  | 2.484(4)       | Br3-Mn2-Br3   | 113.0(2) |
|                 | Mn2-Br4  | 2.549(12)      | Br3-Mn2-Br4   | 105.7(2) |
|                 | Mn3-Br5  | 2.492(4)       | Br5-Mn3-Br5   | 110.5(2) |
|                 | Mn3-Br6  | 2.469(10)      | Br6-Mn1-Br5   | 108.4(2) |

**Table S3.** Details of hydrogen and halogen bonds of LTP

| Hydrogen bonding | D-A (Å) | Hydrogen bonding | D-H...A (°) |
|------------------|---------|------------------|-------------|
| C2 -H...Br8      | 3.200   | C7 -H...Br7      | 3.053       |
| C7 -H...Br1      | 3.198   | C9 -H...Br2      | 3.043       |
| C9 -H...Br9      | 3.197   | C7 -H...Br12     | 3.040       |
| C5 -H...Br2      | 3.194   | C2 -H...Br5      | 3.037       |
| C7 -H...Br2      | 3.192   | C2 -H...Br5      | 3.036       |
| C3 -H...Br12     | 3.187   | C9 -H...Br3      | 3.025       |
| C5 -H...Br3      | 3.186   | C9 -H...Br9      | 3.019       |
| C7 -H...Br2      | 3.178   | C2-H...Br3       | 2.993       |
| C2 -H...Br6      | 3.175   | C7-H...Br1       | 2.986       |
| C9 -H...Br3      | 3.172   | C5-H...Br12      | 2.978       |
| N2 -H...Br2      | 3.171   | C2-H...Br12      | 2.961       |
| C3 -H...Br9      | 3.168   | C5-H...Br12      | 2.949       |
| C9 -H...Br5      | 3.156   | C2-H...Br3       | 2.911       |
| C5 -H...Br1      | 3.154   | C3-H...Br6       | 2.900       |
| C5 -H...Br10     | 3.153   | N2-H...Br3       | 2.911       |
| C9 -H...Br12     | 3.152   | C4-H...Br8       | 2.884       |
| C4 -H...Br6      | 3.145   | C6-H...Br10      | 2.857       |
| C3 -H...Br5      | 3.142   | C4-H...Br8       | 2.853       |
| N4 -H...Br10     | 3.136   | C3 -H...Br10     | 2.851       |
| C7 -H...Br5      | 3.121   | C2 -H...Br7      | 2.844       |
| C5 -H...Br7      | 3.102   | C8 -H...Br11     | 2.836       |
| C2 -H...Br10     | 3.087   | C6 -H...Br11     | 2.827       |
| C9 -H...Br6      | 3.082   | C4 -H...Br11     | 2.809       |
| C6 -H...Br8      | 3.081   | N2 -H...Br4      | 2.751       |
| N2 -H...Br1      | 3.073   | N2 -H...Br4      | 2.659       |
| C6 -H...Br5      | 3.064   | N2 -H...Br4      | 2.648       |
| C3 -H...Br7      | 3.055   |                  |             |

**Table S4.** Details of hydrogen and halogen bonds of HTP

| Hydrogen bonding | D-A (Å) | Hydrogen bonding | D-H...A (°) |
|------------------|---------|------------------|-------------|
| C1 -H...Br4      | 3.190   | C8 -H...Br1      | 3.077       |
| C6 -H...Br1      | 3.189   | C3 -H...Br1      | 3.054       |
| C2 -H...Br6      | 3.180   | C1 -H...Br5      | 3.012       |
| C8 -H...Br1      | 3.169   | C2 -H...Br1      | 2.955       |
| C2 -H...Br1      | 3.160   | C4 -H...Br1      | 2.937       |
| C3 -H...Br1      | 3.156   | C6 -H...Br1      | 2.933       |
| C6 -H...Br5      | 3.149   | C6 -H...Br3      | 2.893       |
| C3 -H...Br2      | 3.148   | C4 -H...Br5      | 2.871       |
| C7 -H...Br3      | 3.109   | C3 -H...Br5      | 2.870       |
| C8 -H...Br3      | 3.095   | C7 -H...Br5      | 2.638       |

**Table S5.** Bond length distortion and bond angle variance of MnBr<sub>4</sub> units of LTP and HTP.

( $\Delta d$ : calculated bond-length distortion degrees,  $\sigma^2$ : bond angle distortion)

| Crystal    | Units   | $\Delta d$ (10 <sup>-5</sup> ) | $\sigma^2$ | Crystal    | Units   | $\Delta d$ (10 <sup>-5</sup> ) | $\sigma^2$ |
|------------|---------|--------------------------------|------------|------------|---------|--------------------------------|------------|
| <b>LTP</b> | Mn1     | 16.48                          | 28.95      | <b>HTP</b> | Mn1     | 0.016                          | 0.027      |
|            | Mn2     | 3.78                           | 14.95      |            | Mn2     | 16.68                          | 16.00      |
|            | Mn3     | 1.09                           | 13.31      |            | Mn3     | 0.64                           | 1.32       |
|            | average | 7.12                           | 19.07      |            | average | 5.78                           | 5.78       |

**Table S6.** Comparison of  $g_{lum}$ , curie temperature ( $T_c$ ), PLQY, SHG intensity and saturation polarization ( $P_s$ ) values inside this work with other multifunctional materials in literatures (black) and this work (red)

| Compounds                                                                             | $g_{lum}$<br>( $10^{-3}$ ) | $T_c$<br>(K) | PLQY<br>(%) | SHG<br>intensity<br>(vs KDP) | $P_s$ ( $\mu Ccm^{-2}$ ) |
|---------------------------------------------------------------------------------------|----------------------------|--------------|-------------|------------------------------|--------------------------|
| OAo-MnCl <sub>4</sub> and OAo- MnBr <sub>4</sub> [2]                                  | /                          | 363          | /           | /                            | 0.51/0.59                |
| (S-CTA) <sub>2</sub> CuCl <sub>4</sub> and (R-CTA) <sub>2</sub> CuCl <sub>4</sub> [3] | /                          | 417/420      | /           | 1/6-1/4                      | /                        |
| (AMP) <sub>2</sub> SbBr <sub>5</sub> [4]                                              | /                          | 327          | /           | 1.3                          | 11.28                    |
| [TMIm][MnCl <sub>4</sub> ] [5]                                                        |                            | 443/429      | 27          |                              | /                        |
| CystaH <sub>2</sub> [CuCl <sub>4</sub> ] [6]                                          | /                          | 384          | /           | /                            | 1.65                     |
| (pyrrolidinium)MnBr <sub>3</sub> [7]                                                  | /                          | 219          | 28.5        | /                            | 5.7                      |
| R/S-3-(fluoropyrrolidinium)MnBr <sub>3</sub> [8]                                      | 6.1                        | 273          | 28.13/32    | /                            | 4.5/4.8                  |
| [MeHdabco]RbI <sub>3</sub> [9]                                                        | /                          | 430          | 17.17       | /                            | 6.8                      |
| (IYA)SbBr <sub>5</sub> [10]                                                           | /                          | 392          | /           | 0.7                          | 2.3                      |
| [DMe-DABCO]CuCl <sub>4</sub> [11]                                                     | /                          | 413          | /           | /                            | 0.53                     |
| [DFPIP] <sub>4</sub> AgBiI <sub>8</sub> [12]                                          | /                          | 422          | /           | 1                            | 10.5                     |
| [C <sub>6</sub> H <sub>16</sub> N <sub>2</sub> ]PbI <sub>4</sub> [13]                 | /                          | 355          | /           | 1.7                          | 15.6                     |
| [(C <sub>8</sub> H <sub>11</sub> ClN) <sub>2</sub> PbI <sub>4</sub> ] [14]            | /                          | 483          | /           | 0.5                          | 13.96                    |
| [Me <sub>3</sub> NCH <sub>2</sub> CH <sub>2</sub> OH]CdCl <sub>3</sub> [15]           | /                          | 360/400      | /           | /                            | 17.1                     |
| <b>1 (This work)</b>                                                                  | 4.8                        | 428          | 30.6        | 0.88                         | 21.5                     |

#### 4. References

1. V. I. Kovalenko, A. A. Akhmediyarov, A. E. Vandyukov, A. R. Khamatgalimov, J. *Mol. Struct.* 2012, **1028**, 134.
2. W. Zhang, S. Jiao, M. Zhao, C. Xu, Z. Yang, D. Li, Z. Tang, Y. Lu, H.-L. Cai, X. S. Wu, *J. Phys. Chem. C.*, 2023, **127**, 17261.
3. R.-G. Xiong, S.-Q. Lu, Z.-X. Zhang, H. Cheng, P.-F. Li, W.-Q. Liao, *Angew. Chem. Int. Ed.*, 2020, **59**, 9574.
4. B. Zhuang, L. Pan, Z.-L. Li, J.-Y. Liu, Z.-X. Zhang, K. Ding, Y. Zhang, Z. Liu, D.-W. Fu, *ACS Materials Lett.*, 2025, **7**, 1540.
5. W.-L. Yang, X. Yan, M. Wang, H. Yuan, Y.-Y. Tang, Y. Qin, X.-J. Song, *Inorg. Chem. Front.*, 2024, **11**, 6874.
6. W.-F. Deng, Y.-X. Li, Y.-X. Zhao, J.-S. Hu, Z.-S. Yao, J. Tao, *J. Am. Chem. Soc.*,

2023, **145**, 5545.

7. Y. Zhang, W.-Q. Liao, D.-W. Fu, H.-Y. Ye, C.-M. Liu, Z.-N. Chen, R.-G. Xiong, *Adv. Mater.*, 2015, **27**, 3942.
8. J.-X. Gao, W.-Y. Zhang, Z.-G. Wu, Y.-X. Zheng, D.-W. Fu, *J. Am. Chem. Soc.*, 2020, **142**, 10, 4756.
9. W.-Y. Zhang, Y.-Y. Tang, P.-F. Li, P.-P. Shi, W.-Q. Liao, D.-W. Fu, H.-Y. Ye, Y. Zhang, R.-G. Xiong, *J. Am. Chem. Soc.*, 2017, **139**, 10897.
10. P. Chen, Z. Zhou, X. Li, S. Jiao, Y. Qin, Y. Shen, H.-L. Cai, X. S. Wu, *Inorg. Chem.*, 2025, **64**, 16487.
11. J.-C. Liu, W.-Q. Liao, P.-F. Li, Y.-Y. Tang, X.-G. Chen, X.-J. Song, H.-Y. Zhang, Y. Zhang, Y.-M. You, R.-G. Xiong, *Angew. Chem. Int. Ed.*, 2020, **59**, 3495.
12. C.-F. Wang, H. Li, M.-G. Li, Y. Cui, X. Song, Q.-W. Wang, J.-Y. Jiang, M.-M. Hua, Q. Xu, K. Zhao, H.-Y. Ye, Y. Zhang, *Adv. Funct. Mater.*, 2021, **31**, 2009457.
13. W.-C. Qiao, H. Qiao, X. L. Wang, H. Xu, F. Xu, Z. Sun, H. Gao, Y.-F. Yao, *Small* 2024, **20**, 2310529.
14. C.-K. Yang, W.-N. Chen, Y.-T. Ding, J. Wang, Y. Rao, W.-Q. Liao, Y.-Y. Tang, P.-F. Li, Z.-X. Wang, R.-G. Xiong, *Adv. Mater.*, 2019, **31**, 1808088.
15. S. Deswal, S. K. Singh, R. Pandey, P. Nasa, D. Kabra, B. Praveenkumar, S. Ogale, R. Boomishankar, *Chem. Mater.*, 2020, **32**, 19, 8333.
